# Supplementary material for: A green and robust solid catalyst facilitating the magnesium sulfite oxidation in the magnesia desulfurization process
Source: Royal Society of Chemistry journal article supplement (doi:10.1039/c7ta01513e), 2017-01-01
Supplement: c7ta01513e1.pdf [file c7ta01513e1.pdf]

## Supplementary materials

Fig.S1

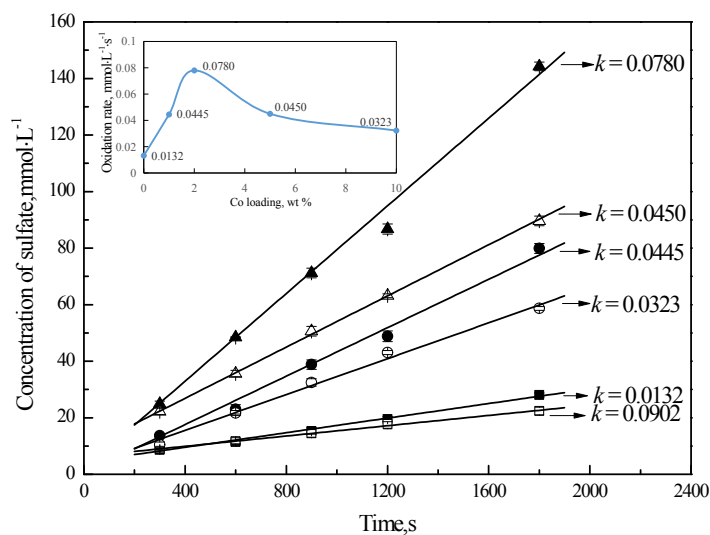

**Fig.S1** Effect of cobalt loading on catalytic performance:  $\square$  in the absence of Co-SBA-15 catalyst;  $\blacksquare$  0 wt%;  $\bullet$  1wt %;  $\blacktriangle$  2wt %;  $\triangle$  5wt %;  $\circ$  10wt %.  $c_{S(IV)}=50\text{g}\cdot\text{L}^{-1}$ ,  $c_{\text{cat}}=1\text{g}\cdot\text{L}^{-1}$ ,  $Q=1\text{L}\cdot\text{min}^{-1}$ ,  $P_{\text{O}_2}=0.21\text{atm}$ ,  $T=318\text{K}$  and pH 8.0.

The oxidation reaction of  $\text{MgSO}_3$  with Co-SBA-15 catalyst was maintained for 30 min as shown in Fig.S1 which displays the variation of the concentration of reaction product, sulfate, with the reaction time.

**Fig.S2**

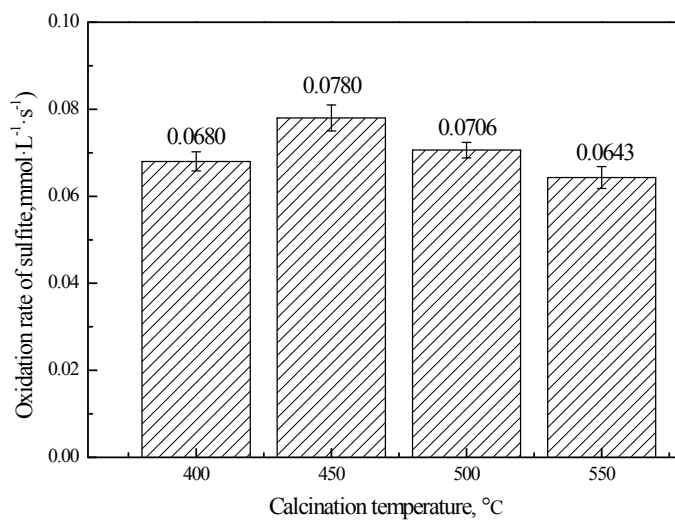

**Fig.S2** Effect of calcinations temperature on the sulfite oxidation rate with the 2wt% Co-SBA-15.

We have conducted the experiments which showed the temperature effect on the oxidation of sulfite, indicating that 450°C is the optimum calcination temperature based on our experimental data as show in Fig.S2.

**Fig.S3**

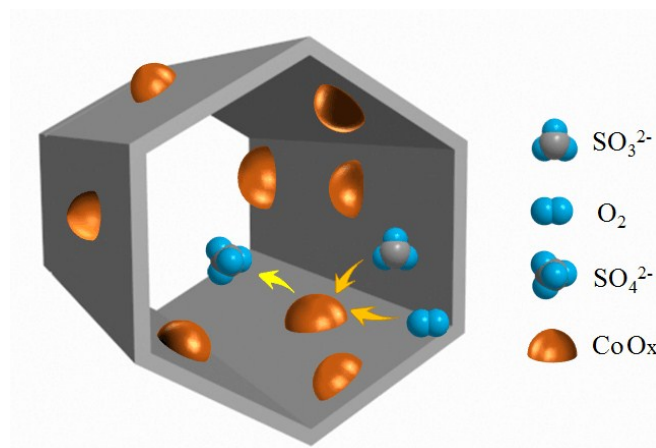

**Fig.S3** Visual structure of Co-SBA-15

The majority of cobalt might be distributed in the interior of SBA-15 as showed in Fig.S3 according to the XPS analysis.
